# Supplementary material
Source: publisher site journal article supplement (https://www.spandidos-publications.com/5104/downloadSupplementary)
Supplement: Supplementary file 1 [file downloadSupplementary]

## Sheet: Table S7
Table SVII. Univariate Cox expression analysis of DNASE1L3.
Cancer	HR	HR.95L	HR.95H	P-value
ACC	0.542281	0.348211	0.844514	0.00677541
BLCA	1.11682	0.952621	1.30932	0.173284
BRCA	0.816471	0.571406	1.16664	0.26548
CESC	0.81073	0.620774	1.05881	0.123459
CHOL	0.881382	0.549774	1.41301	0.600051
COAD	0.723597	0.523455	1.00026	0.0501869
DLBC	1.13601	0.681094	1.89477	0.625151
ESCA	1.10326	0.84506	1.44034	0.470058
GBM	0.626549	0.229958	1.70711	0.360608
HNSC	0.890436	0.768526	1.03168	0.122411
KICH	0.198577	0.0480138	0.821284	0.0256297
KIRC	0.571396	0.460933	0.708331	3.28871e-07
KIRP	0.575275	0.316557	1.04544	0.0696548
LAML	1.01772	0.708418	1.46206	0.924306
LGG	1.0037	0.603347	1.66972	0.988641
LIHC	0.722326	0.617993	0.844273	4.37426e-05
LUAD	0.6802	0.523351	0.884058	0.00395958
LUSC	0.897365	0.743246	1.08344	0.260002
MESO	1.26095	0.777493	2.04503	0.347308
OV	0.131165	0.0251292	0.684635	0.0159811
PAAD	0.549344	0.342719	0.880543	0.0128306
PCPG	0.364856	0.129516	1.02783	0.0563879
PRAD	0.283251	0.027899	2.87577	0.286107
READ	0.875342	0.51387	1.49108	0.624192
SARC	0.699249	0.545371	0.896544	0.0047849
SKCM	0.858424	0.722025	1.02059	0.0837882
STAD	1.07764	0.855453	1.35754	0.52561
TGCT	1.00293	0.482366	2.08527	0.993757
THCA	1.11733	0.630375	1.98044	0.704034
THYM	0.820275	0.414974	1.62143	0.56879
UCEC	0.27296	0.0735324	1.01325	0.0523447
UCS	6.26372	0.730968	53.6742	0.094124
UVM	1.96315	1.23867	3.11139	0.00409305
